# Supplementary material for: Exploring the Release of Elastin Peptides Generated from Enzymatic Hydrolysis of Bovine Elastin via Peptide Mapping
Source: MDPI journal article supplement (doi:10.3390/molecules28227534), 2023-11-10
Supplement: s1 [file s1]

Supplementary material

# Exploring the Release of Elastin Peptides Generated from Enzymatic Hydrolysis of Bovine Elastin via Peptide Mapping

Jianan Zhang <sup>1,2</sup>, Yang Liu <sup>3,\*</sup>, Liwen Jiang <sup>3</sup>, Tiantian Zhao <sup>4</sup>, Guowan Su <sup>1,2</sup> and Mouming Zhao <sup>1,2,\*</sup>

<sup>1</sup> School of Food Science and Engineering, South China University of Technology, Guangzhou 510640, China; fez.jianan@foxmail.com (J.Z.); fegwsu@scut.edu.cn (G.S.)

<sup>2</sup> Guangdong Food Green Processing and Nutrition Regulation Technologies Research Center, Guangzhou 510650, China

<sup>3</sup> College of Food Science and Technology, Hunan Agricultural University, Changsha 410125, China; hnndjlw@163.com

<sup>4</sup> Sericulture & Agri-Food Research Institute, Guangdong Academy of Agricultural Sciences, Key Laboratory of Functional Foods, Ministry of Agriculture and Rural Affairs, Guangdong Key Laboratory of Agricultural Products Processing, Guangzhou 510610, China; fettzhao1989@163.com

\* Correspondence: fs.ly@hunau.edu.cn (Y.L.); femmzhao@scut.edu.cn (M.Z.); Tel./Fax: +86-20-87113914 (M.Z.)

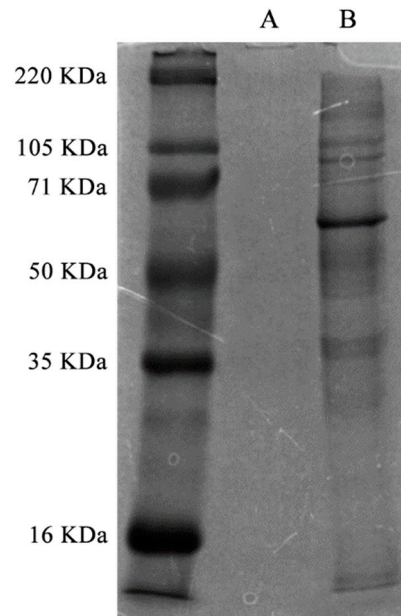

**Figure S1.** SDS-PAGE analysis of purified elastin and original bovine arteries. The SDS-PAGE gel was loaded with 500  $\mu\text{g}$  dry mass of isolated elastin (Lane A) and 500  $\mu\text{g}$  dry mass of original bovine arteries (Lane B). Due to its insoluble polymeric structure, intact elastin does not enter the gel matrix. Only soluble proteins (such as collagen) and elastin breakdown products with lower molecular weights are able to migrate into the gel. This SDS-PAGE analysis demonstrates the purity of the isolated elastin sample compared to the original bovine artery tissue.

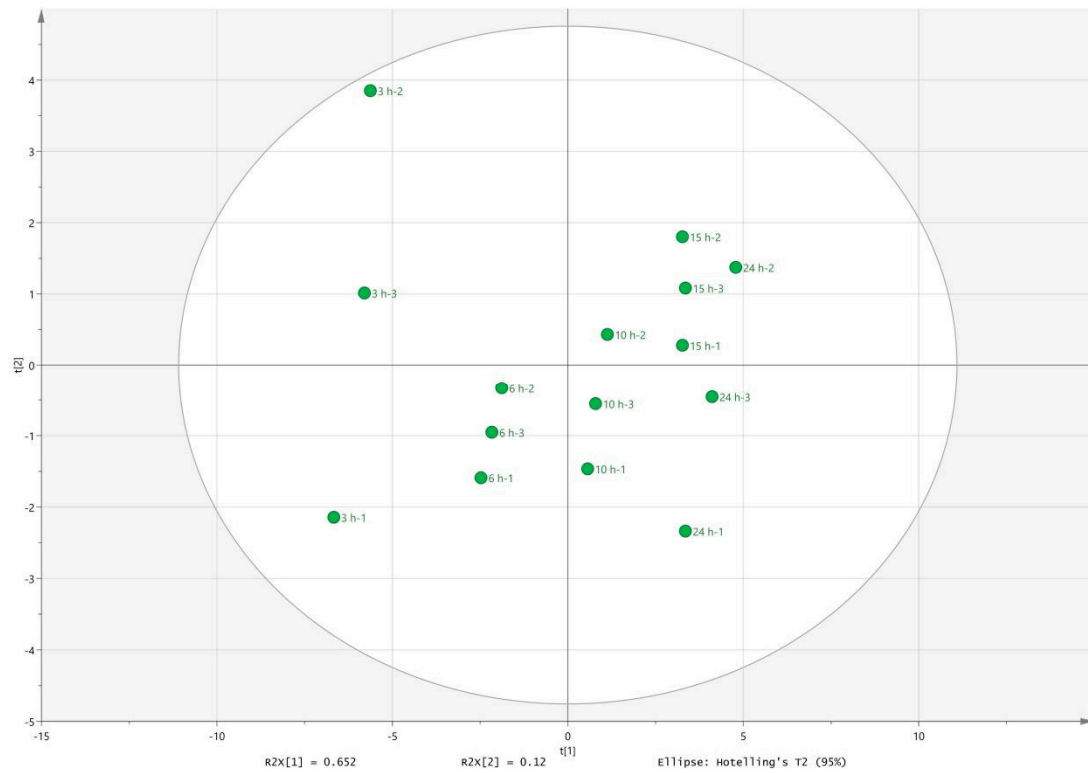

**Figure S2.** PCA analysis of amino acid composition and elastase inhibitory activity of elastin hydrolysates.

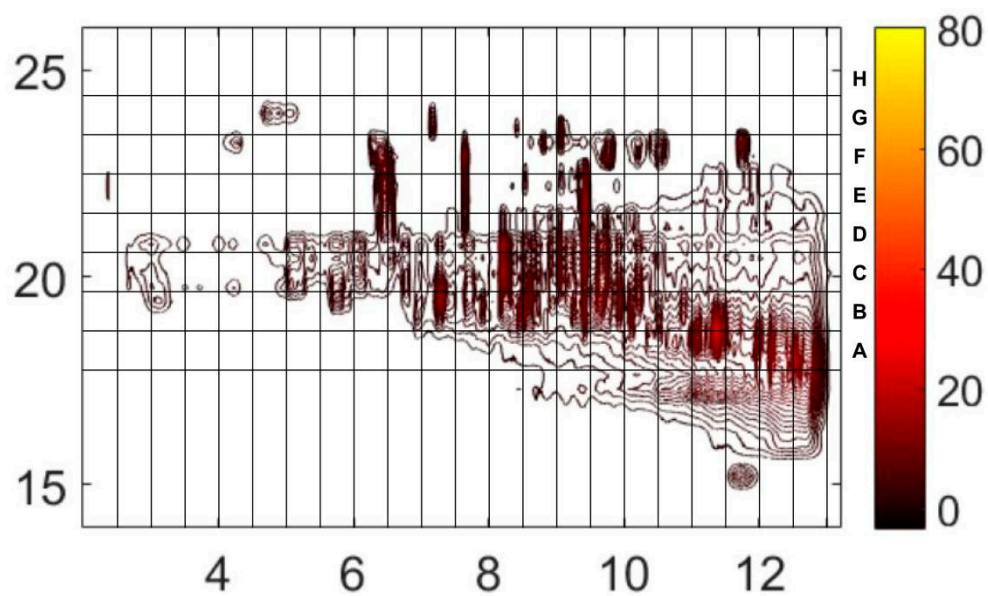

**Figure S3.** Schematic diagram of the name of characteristic peak assignments for elastin hydrolysates.

**Table S1** The changes in the area percentage of the fractions during the hydrolysis of elastin.

| Fraction | Area percentage (%) as a function of hydrolysis time |      |       |       |       |
|----------|------------------------------------------------------|------|-------|-------|-------|
|          | 3 h                                                  | 6 h  | 10 h  | 15 h  | 24 h  |
| F1       | 3.47                                                 | 2.02 | 1.65  | 1.08  | 1.06  |
| F2       | 2.88                                                 | 2.35 | 2.40  | 2.39  | 1.99  |
| F3       | 2.84                                                 | 1.92 | 1.23  | 1.15  | 1.13  |
| F4       | 2.71                                                 | 0.87 | 0.72  | 0.68  | 0.52  |
| F5       | 2.69                                                 | 1.65 | 1.23  | 1.31  | 1.03  |
| F6       | 2.65                                                 | 2.76 | 3.32  | 2.59  | 2.36  |
| F7       | 2.45                                                 | 2.85 | 2.42  | 3.95  | 3.21  |
| F8       | 1.55                                                 | 1.54 | 1.71  | 1.60  | 1.48  |
| F9       | 1.35                                                 | 1.40 | 1.62  | 1.44  | 1.51  |
| F10      | 1.21                                                 | 1.57 | 1.78  | 1.95  | 2.23  |
| F11      | 1.07                                                 | 0.70 | 0.50  | 0.41  | 0.13  |
| F12      | 1.05                                                 | 1.21 | 1.75  | 1.29  | 1.37  |
| F13      | 1.01                                                 | 1.20 | 1.31  | 1.49  | 1.59  |
| F14      | 0.93                                                 | 1.10 | 1.09  | 1.19  | 1.07  |
| F15      | 0.93                                                 | 1.34 | 1.37  | 1.54  | 1.23  |
| F16      | 0.91                                                 | 0.87 | 1.12  | 1.62  | 1.74  |
| F17      | 0.90                                                 | 0.97 | 1.75  | 1.58  | 0.74  |
| F18      | 0.83                                                 | 0.76 | <0.05 | <0.05 | <0.05 |
| F19      | 0.82                                                 | 0.75 | <0.05 | <0.05 | <0.05 |
| F20      | 0.82                                                 | 0.61 | 0.47  | <0.05 | <0.05 |
| F21      | 0.71                                                 | 0.88 | 0.26  | <0.05 | <0.05 |
| F22      | 0.66                                                 | 0.48 | <0.05 | <0.05 | <0.05 |
| F23      | 0.56                                                 | 0.56 | 0.64  | 0.69  | 0.60  |
| F24      | 0.42                                                 | 0.43 | 0.51  | 0.57  | 0.54  |
| F25      | 0.37                                                 | 0.29 | 0.24  | 0.08  | 0.16  |
| F26      | 0.26                                                 | 0.20 | 0.34  | 0.50  | 0.43  |
| F27      | 0.11                                                 | 0.24 | 0.22  | 0.27  | 0.27  |
| F28      | 0.10                                                 | 0.21 | 0.17  | 0.30  | 0.22  |

**Table S2** The frequency of occurrence of the sequences identified from the elastin hydrolysates.

| Peptide          | Repeats | Peptide | Repeats | Peptide    | Repeats |
|------------------|---------|---------|---------|------------|---------|
| GV               | 80      | GVGGI   | 2       | GPGGVAGAA  | 1       |
| AA               | 64      | VVPG    | 2       | GVGAPDAA   | 1       |
| PG               | 60      | VVPGV   | 2       | LVPGGPAG   | 1       |
| AAA              | 37      | QF      | 2       | TGAVVPQ    | 1       |
| VP               | 26      | AF      | 2       | AGAAGLGVG  | 1       |
| GVGV             | 21      | AGVPGLG | 2       | GVGGIGGVG  | 1       |
| AAAA             | 20      | IGAG    | 2       | GARGGVGV   | 1       |
| GL               | 19      | FGPG    | 2       | ARGGVGVG   | 1       |
| VPGVG            | 15      | GAF     | 2       | ALVPGGPA   | 1       |
| GP               | 13      | VVPGVG  | 2       | VAPGIGLG   | 1       |
| AAAAA            | 12      | GAGI    | 2       | VVPQLGA    | 1       |
| VPGVGVPG         | 10      | GAGL    | 2       | VGPQAAAA   | 1       |
| GVPGVGVPG        | 10      | GPGGVAG | 1       | GVGPAAAAA  | 1       |
| PGVGVPGVGVPG     | 10      | GVGVGGA | 1       | GPGGVIGAG  | 1       |
| VGVPGVGVPGV      | 9       | GGVAGVG | 1       | GAVPGTLA   | 1       |
| VPGVGVPGVGVPG    | 9       | GVGGLAG | 1       | GIGGVGGLG  | 1       |
| GVPGVGVPGVGVPG   | 9       | PAAAAAA | 1       | GAFAGIPG   | 1       |
| VGVPGVGVPGVGVPG  | 9       | GVGPAAA | 1       | VPGGPAGAA  | 1       |
| PA               | 9       | AGPGLGA | 1       | VPGAVSPA   | 1       |
| GVPGVGVPGVGVPGV  | 8       | GAGLGGL | 1       | GVLPGVGV   | 1       |
| VGVPGVGVPGVGVPGV | 8       | GIAGVGA | 1       | VLPGVGVG   | 1       |
| PGGV             | 8       | AGGVGAL | 1       | GVGDLGGAG  | 1       |
| GAGV             | 6       | LGAGVGA | 1       | GGVGD LGGA | 1       |
| AL               | 5       | PGGVAGV | 1       | VPGVGIPA   | 1       |

|              |   |          |   |            |   |
|--------------|---|----------|---|------------|---|
| GAL          | 5 | GPGGVIG  | 1 | AGPGLGAGL  | 1 |
| PAAA         | 4 | GVLPGAG  | 1 | GVGVAPGVG  | 1 |
| GVL          | 4 | GGLVPGA  | 1 | ARFPGIG    | 1 |
| GGL          | 4 | APDAAAA  | 1 | GVGAGVPGL  | 1 |
| VGP          | 4 | AVSPAAA  | 1 | PGLGVGAGV  | 1 |
| VGVG         | 4 | VAPGVGV  | 1 | RAAAGLPA   | 1 |
| GVGVG        | 4 | PGGVAGAA | 1 | PDAAAAAAA  | 1 |
| GVPGLGV      | 3 | GVGPQAA  | 1 | GVGAPDAAA  | 1 |
| AQ           | 3 | AGPGLGAG | 1 | GVGGIGGVGG | 1 |
| GVGAL        | 3 | LGAGVGAG | 1 | AGAAGLGVGG | 1 |
| AKF          | 3 | QLGAGVG  | 1 | QLGAGVGAG  | 1 |
| KF           | 3 | LVPGAPG  | 1 | GARGGVGVG  | 1 |
| LGAG         | 3 | LVPGGPA  | 1 | GFPGIGDA   | 1 |
| VGAL         | 3 | PAGVPGL  | 1 | LVPGGPAGA  | 1 |
| AVP          | 3 | PAAAAAAA | 1 | AGVPGLGAV  | 1 |
| GVGALG       | 3 | GVGPAAAA | 1 | GVGPQAAAA  | 1 |
| GVGV PGL     | 2 | VGPQAAA  | 1 | GIPGVGPF   | 1 |
| GVGVGV       | 2 | GTGVGPQ  | 1 | RFPGIGV    | 1 |
| VPGLGVGVG    | 2 | VGGIGGVG | 1 | GPAGAAAAY  | 1 |
| GVPGLGVGV    | 2 | GVGGIGGV | 1 | GVPGAVSPA  | 1 |
| GVGVGV PGL   | 2 | VPGGPAGA | 1 | GVLPGVGVG  | 1 |
| PGVGVVPGV    | 2 | VAPGIGL  | 1 | AVVPQLGA   | 1 |
| GVGVGV PGLG  | 2 | PGLGVGAG | 1 | GVGPAAAAA  | 1 |
| GVGV PGLGVG  | 2 | GVAGVGPA | 1 | GGAGIPGGVA | 1 |
| PGLGVGVGVPG  | 2 | GPGGVIGA | 1 | GIAGVGAPD  | 1 |
| GLGVGVGV PGL | 2 | GIGGVGGL | 1 | GV PGLGAVP | 1 |
| PGVGVVPGVGV  | 2 | GLGVGGIG | 1 | VPGGPAGAAA | 1 |

|                 |   |               |   |                  |   |
|-----------------|---|---------------|---|------------------|---|
| GVGVGV PGLGVG   | 2 | GAFPGAL       | 1 | AGPGLGAGLG       | 1 |
| GVPGLGVGVGV PGL | 2 | GIPAAAAA      | 1 | AVPGTLAAA        | 1 |
| PGLGVGVGV PGLGV | 2 | AGIPGGVA      | 1 | FGPGGVGAL        | 1 |
| AAQ             | 2 | GVLPGAGA      | 1 | GARFPGIG         | 1 |
| VAPG            | 2 | GGLGVGAL      | 1 | GLPAGVPGL        | 1 |
| GVGGL           | 2 | GVGDLGGA      | 1 | VGVPAGIGL        | 1 |
| GLGVGAGVPG      | 1 | GVGV PGLGVGAG | 1 | VVPGVGVAPGIGL    | 1 |
| TGAVVPQL        | 1 | APDAAAAAAAAA  | 1 | GGAGIPGGVAGVGPA  | 1 |
| VGGIGGVGGL      | 1 | GVGAPDAAAAAA  | 1 | PGGVAGVGPAAAAAA  | 1 |
| AGARFPGI        | 1 | ALVPGGPAGAAA  | 1 | AGIPGAPGAIPGIG   | 1 |
| GVLPGAGAR       | 1 | GPGGVIGAGVPA  | 1 | GVPGLGVGAGVPGL   | 1 |
| PDAAAAAAAAA     | 1 | AGIPGGVAGVGP  | 1 | GVGAPDAAAAAAAAA  | 1 |
| APDAAAAAAAAA    | 1 | GIPGGVAGVGPA  | 1 | AGVGAPDAAAAAAAAA | 1 |
| GVGAPDAAAAA     | 1 | GLGVGAGVPGLG  | 1 | GVSTGAVVPQLGA    | 1 |
| LVPGGPAGAA      | 1 | PGGFPGIGDAA   | 1 | PGVGVPGVGVPGAV   | 1 |
| PGVGVPAGVG      | 1 | GGVGVGGIPTF   | 1 | VAPGIGLGPGGVIG   | 1 |
| ALVPGGPAGA      | 1 | GLGGLGVGALGP  | 1 | GIPGGVAGVGPAAAA  | 1 |
| VLPGVPTGA       | 1 | VVPQLGAGVGA   | 1 | GVGPGGFPGIGDAA   | 1 |
| GVLPGVGVGG      | 1 | GIAGVGAPDAAA  | 1 | GVPGGVFFPGAGL    | 1 |
| AGIPGVGPF       | 1 | AAQFGLGPGVG   | 1 | GIAGVGAPDAAAAAA  | 1 |
| PGVGVPAGIG      | 1 | GVPGVGIPAAAA  | 1 | VVPGVGVAPGIGLG   | 1 |
| VLPGVGVGGA      | 1 | LPGVGVPAGVG   | 1 | GVVPGVGVPAGIGL   | 1 |
| AGVLPGVGVG      | 1 | APGAIPGVPGVG  | 1 | GAGIPGAPGAIPGIG  | 1 |
| VGVPGLGVGA      | 1 | PGLGVGAGVPGL  | 1 | PGAPGAIPGIGGIAG  | 1 |
| VGPQAAAAAA      | 1 | VAPGIGLGPGGV  | 1 | VAPGVGVVPGVG VV  | 1 |
| GVGPAAAAAA      | 1 | PGVGVPAGIGLG  | 1 | GVAPGIGLGPGGVIG  | 1 |
| AGVGPAAAAAA     | 1 | FGGQQPGVPL    | 1 | GVPGGVFFPGAGLG   | 1 |



|              |   |                |   |                  |   |
|--------------|---|----------------|---|------------------|---|
| QFGLGPGVG    | 1 | STGAVVPQLGA    | 1 | VAPGIGLPGGGVIGA  | 1 |
| VAPGIGLPG    | 1 | PGIGVLPGVPT    | 1 | GLGPGVGVPAGVGVV  | 1 |
| GLGVGGIGGVG  | 1 | PGVGVPVPGVGA   | 1 | GAFPGALVPGGPAGA  | 1 |
| AGAAGLGVGGI  | 1 | VAPGVGVVPGVG   | 1 | GVGPGGFPGIGDAAA  | 1 |
| ARGGVGVGGI   | 1 | GAGVLPGVGVGGA  | 1 | VPGAPGAIPGVPGVG  | 1 |
| AAAKAAVQL    | 1 | GVGAPDAAAAAAAA | 1 | GGVGDLDGAGIPGGVA | 1 |
| KIGAGGVGAL   | 1 | VVPGVGVAPGIG   | 1 | GVLPGAGARFPGIG   | 1 |
| AGLPAGVPGL   | 1 | GPGGVIGAGVPAA  | 1 | GVAPGIGLPGGGVIGA | 1 |
| GVFFPGAGL    | 1 | GVSTGAVVPQL    | 1 | VAPGIGLPGGGVIGAG | 1 |
| GAVPGGVPGGV  | 1 | PGALVPGGPAGAA  | 1 | GVGGLGVSTGAVVPQ  | 1 |
| GPGVGVAPGVG  | 1 | PGVGVPVPGVGVV  | 1 | PGVGVAPGIGLPGGGV | 1 |
| PDAAAAAAAAA  | 1 | VPGVGVAPGIGL   | 1 | GIPGGVAGVGPAAAAA | 1 |
| GVGAPDAAAAA  | 1 | GLGPGVGVPAGVG  | 1 | GAFPGALVPGGPAGAA | 1 |
| APDAAAAAAAAA | 1 | GVPGLGAVPGL    | 1 | RFPGIGVLPGVPT    | 1 |
| STGAVVPQL    | 1 | GVGVGVVPGLVGA  | 1 | GVGPGGFPGIGDAAAA | 1 |
| FRAAAGLPA    | 1 | GIAGVGAPDAAAA  | 1 | GGLVPGAPGAIPGVPG | 1 |
| GFPGIGDAAA   | 1 | AVSPA          | 1 | VAPGIG           | 1 |
| ALVPGGPAGAA  | 1 | AY             | 1 | GVGL             | 1 |
| GVLPGVGVGGA  | 1 | GGVL           | 1 | GVGI             | 1 |
| GAGVLPGVGVG  | 1 | GVGGLA         | 1 | AFPGAL           | 1 |
| GVGVVPGLVGA  | 1 | GVGPQ          | 1 | VYPG             | 1 |
| AGLGGLGVGAL  | 1 | GGVGGL         | 1 | AGPGLG           | 1 |
| GVAPGIGLPG   | 1 | GVAGVG         | 1 | GYPT             | 1 |
| GLGVGAGVPGL  | 1 | GVIGAG         | 1 | PGGPA            | 1 |
| GIAGVGAPDAA  | 1 | AFPGALVPGGPA   | 1 | TL               | 1 |
| GARGGVGVGGI  | 1 | GIGGIAGVGAPDA  | 1 | TI               | 1 |
| GIPTFGVGP    | 1 | IAGVGAPDAAAAA  | 1 | AAQF             | 1 |

|                                |   |                |   |                             |   |
|--------------------------------|---|----------------|---|-----------------------------|---|
| KFGPGGVGAL                     | 1 | GVGVGVPGLVGV   | 1 | LGPGGV                      | 1 |
| PGVGVAPGVGV                    | 1 | GLGVGGIGGVGGLG | 1 | LPGVG                       | 1 |
| APGVGVVPGVG                    | 1 | PGGVFFPGAGLG   | 1 | GVGPA                       | 1 |
| TGAVVPQLGA                     | 1 | PGAPGAIPGIGGI  | 1 | LGGA                        | 1 |
| GVGALGGVGD                     | 1 | GIPGAPGAIPGIG  | 1 | GGVGD                       | 1 |
| GVSTGAVVPQ                     | 1 | LGPVGVPAPGVGV  | 1 | GIPGAPGAIPGIGGIA            | 1 |
| PGAIPGVPGVG                    | 1 | GVGAPDAAAAAAAA | 1 | GGVGVGGIPTFGVGP             | 1 |
| PGAIPGIGGIA                    | 1 | PGVGVAPGIGLGP  | 1 | PGVGVVPGVGVAPGIG            | 1 |
| FFPGAGLGGL                     | 1 | GVVPGVGVVPGVG  | 1 | GVGVPGLVGVGVPG              | 1 |
| GPGGVGAL                       | 1 | PFGGQQPGVPL    | 1 | GLPAGVPGLGVGVGP             | 1 |
| PDAAAA                         | 1 | GVGALGGVGD     | 1 | VVPGVGVAPGIGLGP             | 1 |
| AGVGPAAAA                      | 1 | VAPGIGLPGGVI   | 1 | GGFPGVGVPGVGP               | 1 |
| LVPGGPAGAAA                    | 1 | GAFPGALVPGGPA  | 1 | LVPGAPGAIPGVPGVG            | 1 |
| VAPGVGVVPGV                    | 1 | GIAGVGAPDAAAA  | 1 | GPGVGVAPGVGVVPGV            | 1 |
| GVPGGVFFPGA                    | 1 | GVGALGGLVPGAPG | 1 | GVPGGVFFPGAGLGGL            | 1 |
| GLGPGVG                        | 1 | GLGVGAGVPGLGAV | 1 | GLVPGAPGAIPGVPGVG           | 1 |
| GGVGGLG                        | 1 | PGIGVLPGVPTGA  | 1 | RFPGIGVLPGVPTGA             | 1 |
| GQ                             | 1 | APGVG          | 1 | GALPGAFFGALVPGGPA           | 1 |
| GQQ                            | 1 | GAAGL          | 1 | GGLVPGAPGAIPGVPGVG          | 1 |
| PAGAA                          | 1 | GVGAPD         | 1 | GVGVGVPGLVGVGVPG            | 1 |
| AQAAA                          | 1 | GGVGD          | 1 | GVPGVGVPGVGVPGAVSP          | 1 |
| AAQAA                          | 1 | GIGGVG         | 1 | VPGVGVPGVGVPGAVSPA          | 1 |
| GAPGAIPGIGGIAGVGAPDAAAAAAAAAKA | 1 | GFGPG          | 1 | PGVGVPGVGVPGVGVPGVGVPGAVSP  | 1 |
| GVPGVGVPGVGVPGVGVPGVGVPGAVS    | 1 | AAGLG          | 1 | VGVPGVGVPGVGVPGVGVPGAVSPAAA | 1 |
| AGVGP                          | 1 | GIGL           | 1 | PGVGVPGVGVPGVGVPGV          | 1 |
| GGLA                           | 1 | PGGVIG         | 1 | GVPGVGVPGAVSP               | 1 |
|                                |   |                |   | GGGAF                       | 1 |

|        |   |        |   |       |   |
|--------|---|--------|---|-------|---|
| GVPGGV | 1 | VAPGVG | 1 | TLA   | 1 |
| GLPY   | 1 | AAV    | 1 | GAFPG | 1 |
| AGPGL  | 1 | GGAF   | 1 | VAGV  | 1 |
| GVGPG  | 1 |        |   |       |   |

---
